# Supplementary material for: Comparisons of short-term outcomes of anastomotic methods of duct-to-mucosa pancreaticojejunostomy: out-layer continuous suture versus modified Blumgart method
Source: PubMed Central journal article supplement — Ann Surg Treat Res. 2022 Dec 8;103(6):331–9. doi: 10.4174/astr.2022.103.6.331 (PMC9763782; doi:10.4174/astr.2022.103.6.331), 2022-12-08
Supplement: astr-103-331-s001.pdf [file astr-103-331-s001.pdf]

**Supplementary Table 1.** Univariate and multivariate analyses for severe complications (Clavien-Dindo grade  $\geq$  III)

| Variable                                   | Univariate analysis  |         | Multivariate analysis |         |
|--------------------------------------------|----------------------|---------|-----------------------|---------|
|                                            | OR (95% CI)          | P-value | OR (95% CI)           | P-value |
| Patient characteristic                     |                      |         |                       |         |
| Age                                        | 1.033 (0.997–1.033)  | 0.072   | NA                    | NA      |
| Male sex                                   | 2.028 (1.029–3.996)  | 0.041   | 1.581 (0.760–3.287)   | 0.221   |
| Body mass index                            | 1.104 (0.997–1.222)  | 0.057   | NA                    | NA      |
| ASA PS classification, III vs. I, II       | 2.044 (0.914–4.567)  | 0.082   | NA                    | NA      |
| Hypertension                               | 1.541 (0.817–2.905)  | 0.182   | NA                    | NA      |
| Diabetes mellitus                          | 1.324 (0.698–2.512)  | 0.391   | NA                    | NA      |
| Cardiac disease                            | 2.133 (0.639–7.122)  | 0.218   | NA                    | NA      |
| Respiratory disease                        | 2.578 (0.229–29.036) | 0.443   | NA                    | NA      |
| Neoadjuvant therapy                        | 0.702 (0.309–1.595)  | 0.398   | NA                    | NA      |
| Previous major abdominal surgery           | 1.599 (0.503–5.207)  | 0.419   | NA                    | NA      |
| Diagnostic and operative factor            |                      |         |                       |         |
| Diagnosis related to pancreas (others)     | 4.212 (2.104–8.432)  | <0.001  | 4.447 (2.162–9.148)   | <0.001  |
| Malignancy                                 | 1.972 (0.667–5.831)  | 0.220   | NA                    | NA      |
| SMV/PV resection                           | 1.730 (0.692–4.325)  | 0.241   | NA                    | NA      |
| Pancreatic texture (soft vs. firm or hard) | 1.339 (0.685–2.617)  | 0.393   | NA                    | NA      |
| Size of main pancreatic duct               | 0.788 (0.621–1.002)  | 0.051   | NA                    | NA      |
| Duration of operation                      | 1.010 (1.004–1.015)  | 0.001   | 1.010 (1.004–1.016)   | 0.001   |
| Estimated blood loss                       | 1.001 (1.000–1.001)  | 0.102   | NA                    | NA      |
| Type of operation (mBM)                    | 1.599 (0.840–3.045)  | 0.153   | NA                    | NA      |

OR, odds ratio; CI, confidence interval; NA, not applicable; ASA, American Society of Anesthesiologists; PS, physical status; SMV, superior mesenteric vein; PV, portal vein; mBM, modified Blumgart method.
